# Supplementary material
Source: publisher figshare collection journal article supplement (https://frontiersin.figshare.com/ndownloader/files/24720323)
Supplement: Supplementary file 1 [file 24720323]

**A**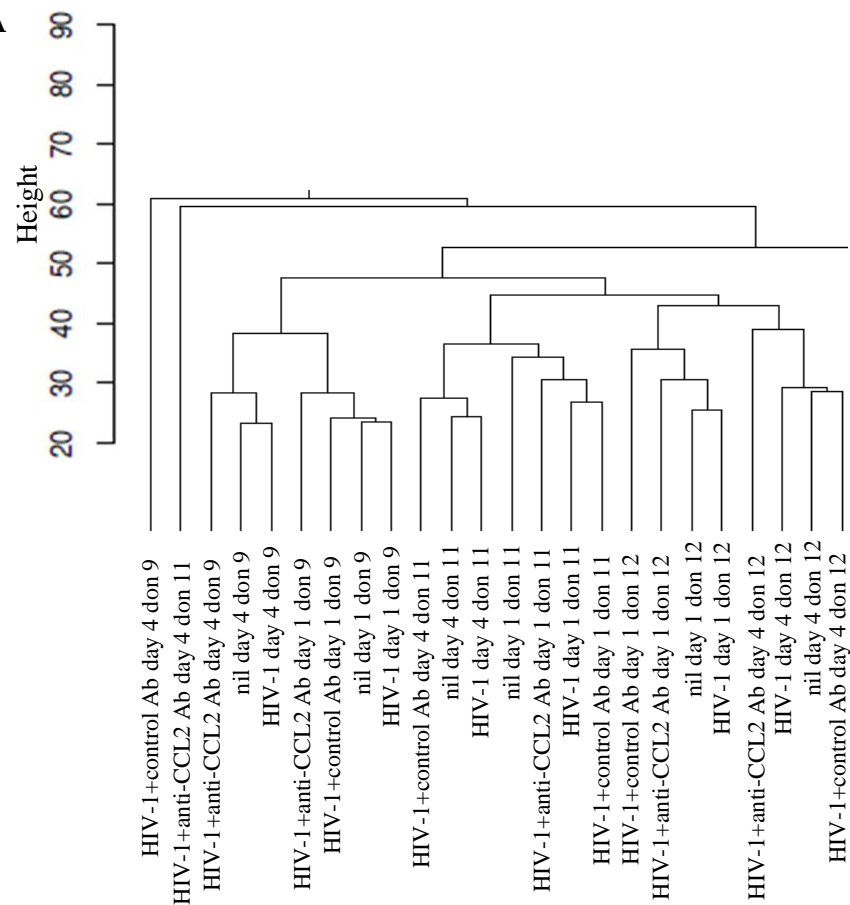**B**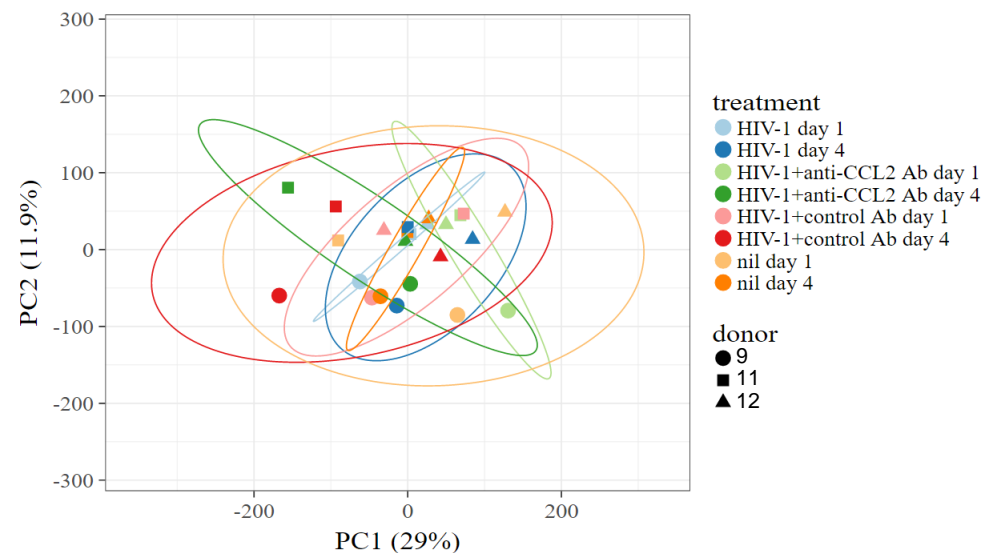

**Supplementary Figure 7.** Clustering of RNA-seq dataset 3. MDMs obtained from 3 different donors were treated or not with anti-CCL2 or control Ab (2.5  $\mu\text{g/ml}$ ) for 4 h and then infected with HIV-1. Total RNA was extracted at day 1 and 4 p.i., subjected to poly(A) selection followed by reverse transcription, generation of cDNA libraries, and sequencing. (A) Hierarchical clustering of RNA-seq data. (B) Principal component analysis of RNA-seq data. Unit variance scaling was applied to rows; SVD with imputation was used to calculate principal components;  $n = 24$  data points. Prediction ellipses are such that with probability 0.95, a new observation from the same group will fall inside the ellipse.
