# Supplementary material
Source: publisher figshare collection journal article supplement (https://frontiersin.figshare.com/ndownloader/files/24720323)
Supplement: Supplementary file 2 [file 24720323]

**A**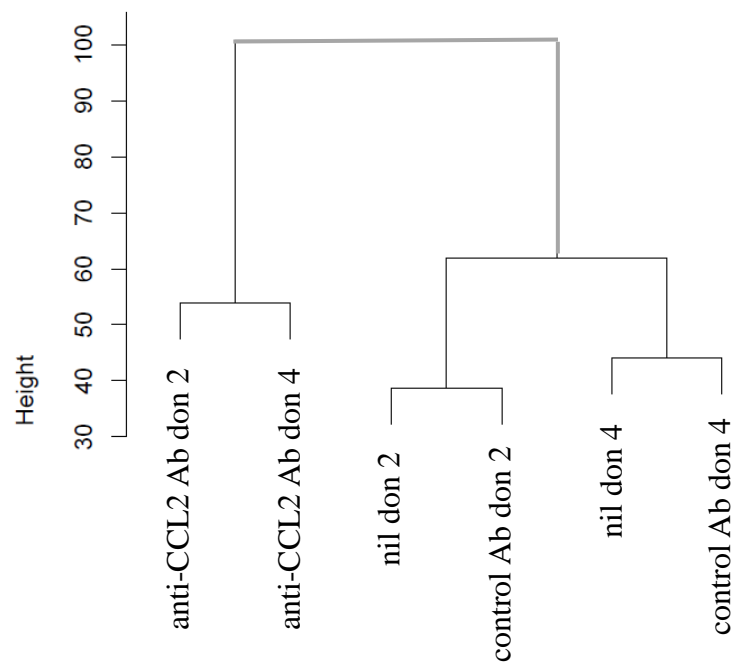**B**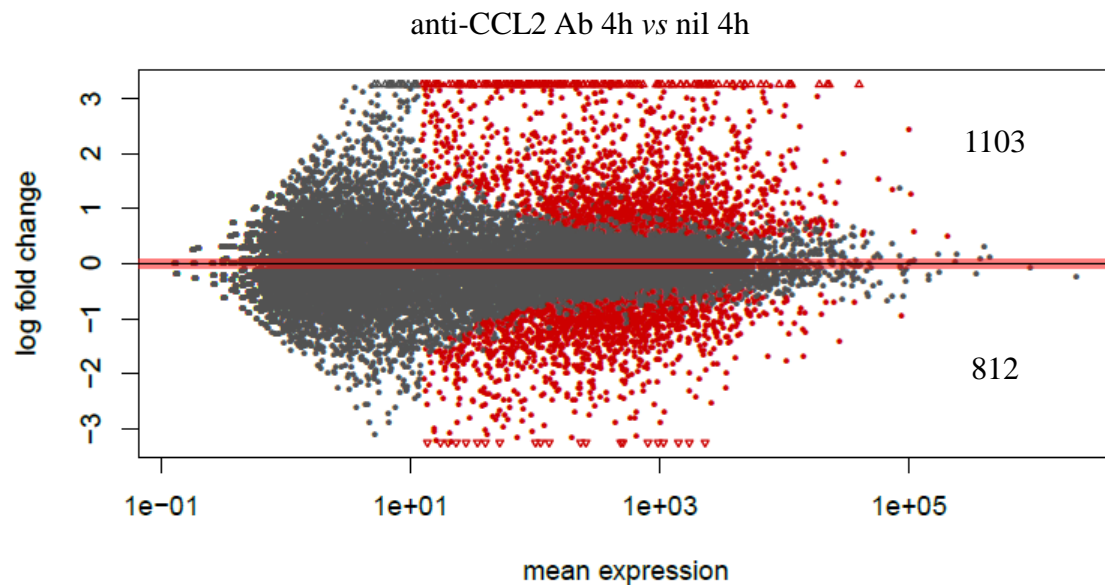

**Supplementary Figure 4.** Hierarchical clustering and differential expression analysis of dataset 2. MDMs obtained from 2 different donors were treated or not with anti-CCL2 or control Ab (2.5  $\mu\text{g/ml}$ ) for 4 h. Total RNA was extracted, subjected to poly(A) selection followed by reverse transcription, generation of cDNA libraries, and sequencing. (A) Hierarchical clustering of RNA-seq data. (B) Volcano plot representation of differential expression analysis of genes in the anti-CCL2 Ab 4h versus nil 4h comparison. A total of 1,915 transcripts (of whom 1103 and 812 were respectively up- and down-regulated) had a threshold adjusted p-value  $< 0.1$  and log2 fold change  $\geq 1$  or  $\leq -1$ .
