# Supplementary material
Source: publisher figshare collection journal article supplement (https://frontiersin.figshare.com/ndownloader/files/24720323)
Supplement: Supplementary file 5 [file 24720323]

**A**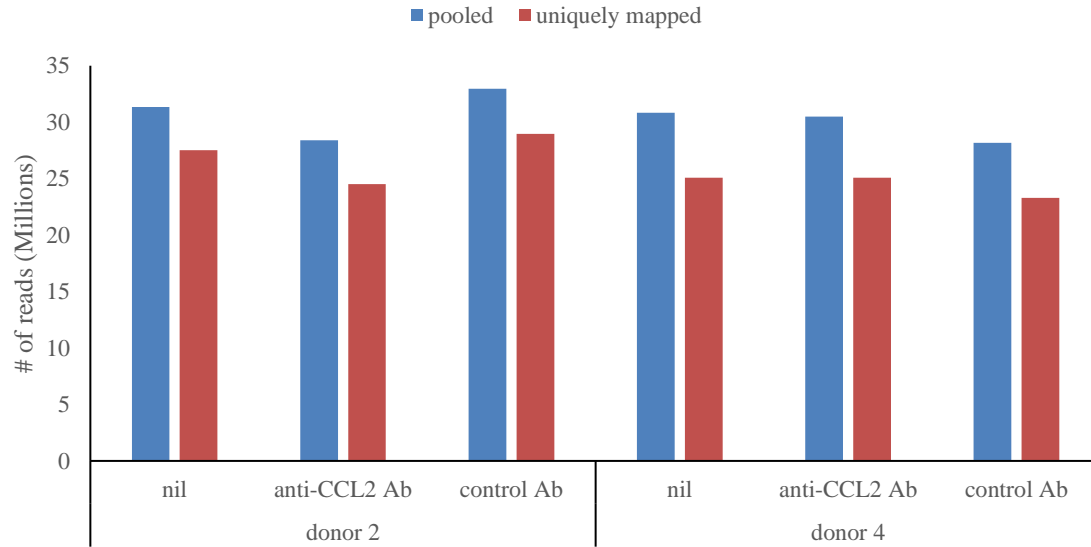**B**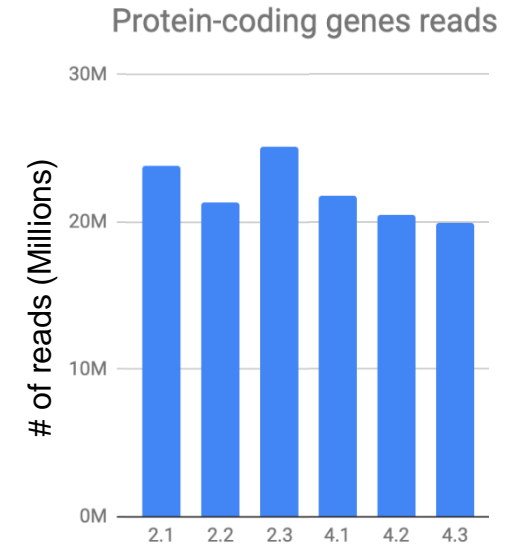

**Supplementary Figure 3.** Descriptive statistics of RNA-seq dataset 2. MDMs obtained from 2 different donors were treated or not with anti-CCL2 or control Ab (2.5 µg/ml) for 4 h. Total RNA was extracted, subjected to poly(A) selection followed by reverse transcription, generation of cDNA libraries, and sequencing. (A) Raw and uniquely mapped reads per sample. (B) Protein-coding genes reads per sample. The numeric codes in the x axis identify the different donors (first number) and conditions (second number; 1 = nil 4 h, 2 = anti-CCL2 Ab 4 h, 3 = control Ab 4 h).
