# Supplementary material
Source: publisher figshare collection journal article supplement (https://frontiersin.figshare.com/ndownloader/files/24720323)
Supplement: Supplementary file 6 [file 24720323]

A

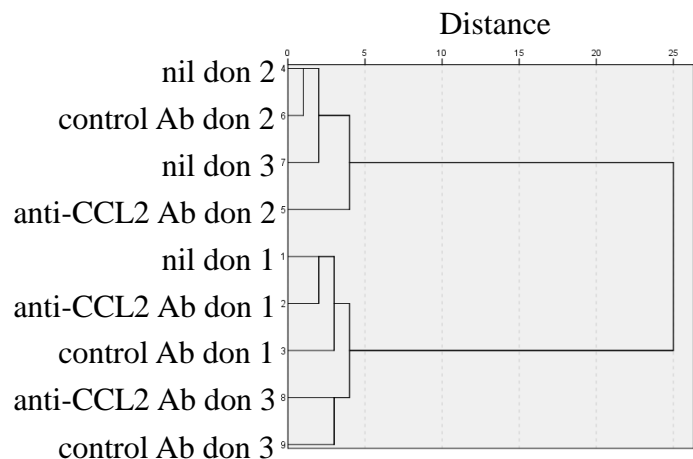

B

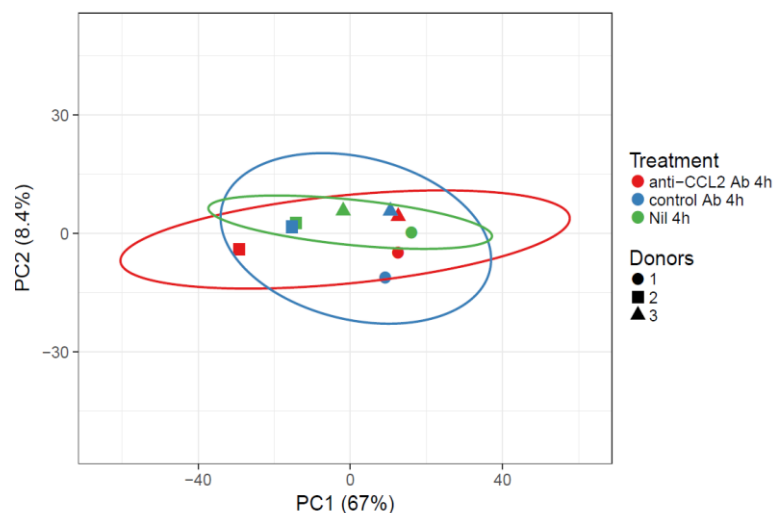

C

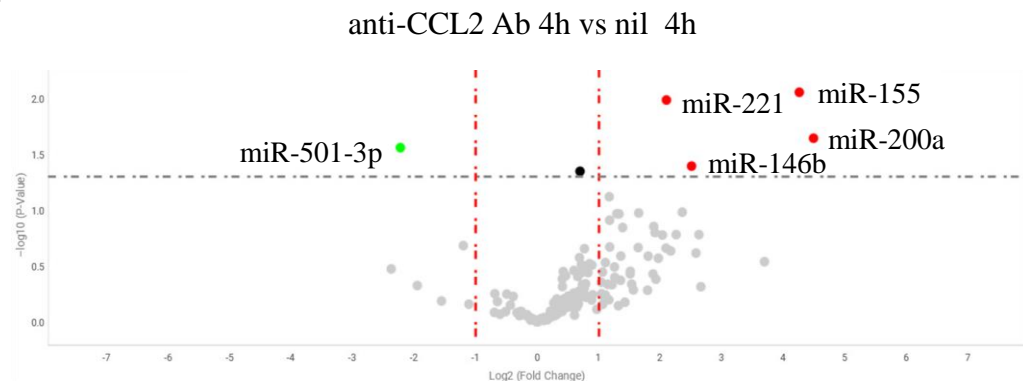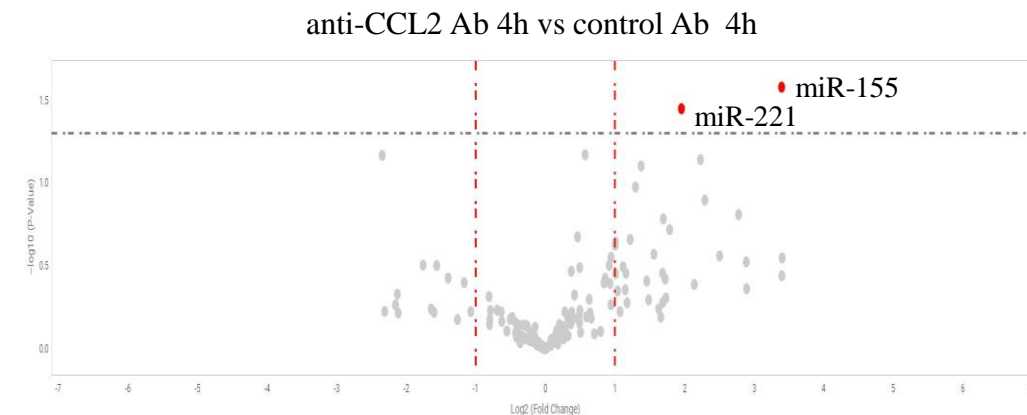

**Supplementary Figure 5.** Clustering and differential expression analysis of miRNA array data. MDMs obtained from 3 different donors were treated or not with anti-CCL2 or control Ab (2.5  $\mu\text{g/ml}$ ) for 4 h. Total RNA was extracted and subjected to reverse transcription and miRNA microarray analysis. (A) Cluster analysis dendrogram of array data. (B) Principal component analysis of array data. Unit variance scaling was applied to rows; SVD with imputation was used to calculate principal components;  $n = 24$  data points. Prediction ellipses are such that with probability 0.95, a new observation from the same group will fall inside the ellipse. (C) Volcano plot representation of differential expression analysis ( $p$  value  $< 0.05$  and  $\text{FC} > 2$ ) of miRNAs in the anti-CCL2 Ab 4h versus nil 4h and anti-CCL2 Ab 4h versus control Ab 4h comparisons.
